# Supplementary material for: High Burden of Premature Ventricular Complex Increases the Risk of New‐Onset Atrial Fibrillation
Source: PubMed Central journal article supplement — J Am Heart Assoc. 2023 Feb 15;12(4):e027674. doi: 10.1161/JAHA.122.027674 (PMC10111494; doi:10.1161/jaha.122.027674), 2023-02-15
Supplement: JAH3-12-e027674-s001.pdf [file JAH3-12-e027674-s001.pdf]

## **SUPPLEMENTAL MATERIAL**

**Table S1.** Univariable and multivariable Cox regression models for new-onset AF based on different cut-off value of PVC daily count

| Variable                  | Univariate model      |             | Multivariable model      |             |
|---------------------------|-----------------------|-------------|--------------------------|-------------|
|                           | Crude HR<br>(95 % CI) | p-<br>value | Adjusted HR<br>(95 % CI) | p-<br>value |
| PVC count < 1000          | Ref.                  | -           | Ref.                     | -           |
| 1000 ≤ PVC count<br><5000 | 1.74 (1.29-2.36)      | <0.001      | 1.48 (1.09-2.00)         | 0.011       |
| PVC count ≥ 5000          | 1.80 (1.34-2.41)      | <0.001      | 1.66 (1.23-2.23)         | 0.001       |
| Age ≥ 60                  | 3.75 (2.94-4.77)      | <0.001      | 3.52 (2.73-4.54)         | <.0001      |
| Male                      | 1.34 (1.10-1.61)      | 0.003       | 1.15 (0.94-1.40)         | 0.167       |
| DM                        | 1.76 (1.44-2.15)      | <0.001      | 1.20 (0.97-1.48)         | 0.095       |
| HTN                       | 2.09 (1.71-2.57)      | <0.001      | 1.18 (0.94-1.47)         | 0.147       |
| HF                        | 2.83 (2.27-3.52)      | <0.001      | 2.51 (2.00-3.15)         | <.0001      |
| CAD                       | 1.96 (1.56-2.48)      | <0.001      | 1.10 (0.85-1.41)         | 0.472       |
| Alcoholism                | 3.39 (1.40-8.19)      | 0.007       | 3.68 (1.51-9.00)         | 0.004       |
| Hyperthyroidism           | 1.27 (0.75-2.17)      | 0.377       | 1.52 (0.88-2.61)         | 0.134       |

CAD, coronary artery disease; CI, confidence interval; DM, diabetes mellitus;

HF, heart failure; HR, hazard ratio; HTN, hypertension; PVC, premature

ventricular complex.

**Table S2.** Univariable and multivariable Cox regression models for new-onset

AF based on PVC daily burden in percentile

| Variable                 | Univariate model      |         | Multivariable model      |         |
|--------------------------|-----------------------|---------|--------------------------|---------|
|                          | Crude HR<br>(95 % CI) | p-value | Adjusted HR<br>(95 % CI) | p-value |
| PVC burden in percentile | 9.36 (2.19-40.10)     | 0.003   | 8.05 (1.79-36.29)        | 0.007   |
| Age $\geq$ 60            | 3.75 (2.94-4.77)      | <0.001  | 3.56 (2.76-4.59)         | <0.001  |
| Male                     | 1.34 (1.10-1.61)      | 0.003   | 1.17 (0.96-1.42)         | 0.129   |
| DM                       | 1.76 (1.44-2.15)      | <0.001  | 1.21 (0.98-1.49)         | 0.078   |
| HTN                      | 2.09 (1.71-2.57)      | <0.001  | 1.20 (0.96-1.49)         | 0.113   |
| HF                       | 2.83 (2.27-3.52)      | <0.001  | 2.50 (1.99-3.14)         | <0.001  |
| CAD                      | 1.96 (1.56-2.48)      | <0.001  | 1.10 (0.85-1.41)         | 0.472   |
| Alcoholism               | 3.39 (1.40-8.19)      | 0.007   | 3.80 (1.56-9.28)         | 0.003   |
| Hyperthyroidism          | 1.27 (0.75-2.17)      | 0.377   | 1.47 (0.85-2.53)         | 0.167   |

PVC, premature ventricular complex.

Multivariable model: adjusted for age, sex, DM, HTN, HF, CAD, alcoholism,  
and hyperthyroidism.
